# Supplementary material for: Expressing Parasitoid Venom Protein VRF1 in an Entomopathogen Beauveria bassiana Enhances Virulence toward Cotton Bollworm Helicoverpa armigera
Source: PubMed Central journal article supplement (PMC10304766; doi:10.1128/aem.00705-23), 2023-06-05
Supplement: aem.00705-23-s0001.pdf [file aem.00705-23-s0001.pdf]

**Table S1. Sequences of primers used in the study**

| Primer       | Forward /Reverse | Sequence                                              | Notes                                                                        |
|--------------|------------------|-------------------------------------------------------|------------------------------------------------------------------------------|
| Bb_sp        | F                | ATGGCTCCTTTTCTTCAAACC                                 | Gene cloning of signal peptide of <i>Bbchit1</i>                             |
|              | R                | GGTTGCGCAGGTGTC                                       |                                                                              |
| VRF1         | F                | GCAGAAGTGATTAATAGAAGACAT                              | Gene cloning of <i>VRF1</i> (without signal peptide)                         |
|              | R                | AGCACTTGAGTCATTTATGAG                                 |                                                                              |
| mCherry      | F                | ATGGTGAGCAAGGGCGAGGAG                                 | Gene cloning of <i>mCherry</i>                                               |
|              | R                | TTACTTGTACAGCTCGTCCATGC                               |                                                                              |
| L-pPK2       | F                | TCATATAACCAATTGCCCTCATC                               | Plasma linearization                                                         |
|              | R                | TCATGTATGTAGTGGGTGTGC                                 |                                                                              |
| R-Bb_sp      | F                | <b>GGCTGCAGGAATTCGATATCA</b> TGGCTCCTTTTCTTCAAACCA    | Recombinant cloning for pPK2-Bar-EGFP-VRF1                                   |
|              | R                | <b>TAATCACTTCTGCGGTTGCGCA</b> GGTGTCCGGC              |                                                                              |
| R-VRF1       | F                | <b>CGCAACCGCAGAA</b> GTGATTAA TAGAAGACA TGTACA        |                                                                              |
|              | R                | <b>TGCTCACCATAGCACTT</b> GAGTCATTTATGAG ATTTTC        |                                                                              |
| R-mCherry    | F                | <b>CTCAAGTGCTATGGT</b> GAGCAAGGGCGAGG                 |                                                                              |
|              | R                | <b>TCGACGGTATCGATAAGCTTTT</b> ACTTGTACA GCTCGTCCATGCC |                                                                              |
| gBVmt        | F                | AAGTATGCAAAGCATGCCGAG                                 | Verification of cassette from <i>gpdA</i> promoter to <i>trpC</i> terminator |
|              | R                | ACATGCATTGCAGATGAGCTGTATC                             |                                                                              |
| Q-Bb-actin   | F                | AGATTTGGCACCAACCTT                                    | Semi-quantitative RT-PCR                                                     |
|              | R                | GGCAGCAGTCTGAATCTCCT                                  |                                                                              |
| Q-VRF1       | F                | GAACATTGTAGTTGAAGCCACA                                |                                                                              |
|              | R                | ATAAGAGCCAGTACTATTTTCCT                               |                                                                              |
| Ha_defensin  | F                | GAGAGACTCCTCCGTGTTGC                                  | Quantitative RT-PCR                                                          |
|              | R                | CGTCGTTTCTTCGGAATCGC                                  |                                                                              |
| Ha_moricin1  | F                | TTGGCTTAGTAGTTCTTGT                                   |                                                                              |
|              | R                | GTGGCCAGTGCCGATCGCAC                                  |                                                                              |
| Ha_moricin5  | F                | AACAACCGACCCCGCTTTC                                   |                                                                              |
|              | R                | TTCTTCA TGGTGATTCTGGC                                 |                                                                              |
| Ha_lysozyme1 | F                | GAGTTGAGGAGGCAAGGGTT                                  |                                                                              |
|              | R                | ATACAGGCCGTAGTCTCGGG                                  |                                                                              |
| Ha_RpS3      | F                | ACGGAGTTTCAAGCGGAA                                    | Quantitative RT-PCR (internal standard)                                      |
|              | R                | GACTGCTCCGGATGTTGAA                                   |                                                                              |

P.S. : sequences in bold font are the overlaps for homologous recombinant cloning.

**Table S2. Comparison of virulence between WT and BbVRF1 against *H. armigera* larvae in laboratory conditions**

|           | LT <sub>50</sub> (days)<br>(95% confidence interval) | LD <sub>50</sub> ( $\times 10^3$ conidia)<br>(95% confidence interval) |
|-----------|------------------------------------------------------|------------------------------------------------------------------------|
| Wild type | 5.69 (3.52 – 6.63)                                   | 2.90 (2.27 – 3.60)                                                     |
| BbVRF1    | 4.79 (4.63 – 4.95)                                   | 1.23 (0.96 – 1.53)                                                     |

LT<sub>50</sub>: median lethal time at  $1 \times 10^4$  conidia of injection treatment.

LD<sub>50</sub>: median lethal dose at 8 days after the injection treatments ( $1 \times 10^2$ ,  $1 \times 10^3$ ,  $5 \times 10^3$ ,  $1 \times 10^4$  and  $2.5 \times 10^4$  conidia).

**Table S3. Bioassay results of WT and BbVRF1 on *H. armigera* and *S. frugiperda* under gradient doses**

| Injection dose<br>(number of conidia) | Number of larvae | Number of mortality |        |            |        |
|---------------------------------------|------------------|---------------------|--------|------------|--------|
|                                       |                  | <i>Ha.</i>          |        | <i>Sf.</i> |        |
|                                       |                  | WT                  | BbVRF1 | WT         | BbVRF1 |
| Control (1×PBS)                       | 72               | 0                   | 0      | 0          | 0      |
| 1.0×10 <sup>2</sup>                   | 72               | 0                   | 5      | 0          | 5      |
| 1.0×10 <sup>3</sup>                   | 72               | 15                  | 30     | 12         | 25     |
| 5.0×10 <sup>3</sup>                   | 72               | 47                  | 61     | 33         | 53     |
| 1.0×10 <sup>4</sup>                   | 72               | 60                  | 70     | 45         | 63     |
| 2.5×10 <sup>4</sup>                   | 72               | 72                  | 72     | 59         | 68     |

**Table S4. Time-course bioassay results of WT and BbVRF1 on *H. armigera* and *S. frugiperda* after injection of  $1 \times 10^4$  conidia**

| Days after injection | Number of cumulative mortality |    |        |            |    |        |
|----------------------|--------------------------------|----|--------|------------|----|--------|
|                      | <i>Ha.</i>                     |    |        | <i>Sf.</i> |    |        |
|                      | Control                        | WT | BbVRF1 | Control    | WT | BbVRF1 |
| 1                    | 0                              | 0  | 0      | 0          | 0  | 0      |
| 2                    | 0                              | 0  | 0      | 0          | 0  | 0      |
| 3                    | 0                              | 0  | 0      | 0          | 0  | 0      |
| 4                    | 0                              | 0  | 7      | 0          | 0  | 0      |
| 5                    | 0                              | 18 | 48     | 0          | 0  | 14     |
| 6                    | 0                              | 49 | 65     | 0          | 9  | 50     |
| 7                    | 0                              | 54 | 70     | 0          | 22 | 62     |
| 8                    | 0                              | 66 | 72     | 0          | 45 | 63     |

**Table S5. Comparison of virulence between WT and BbVRF1 against *S. frugiperda* larvae in laboratory conditions**

|           | LT <sub>50</sub> (days)<br>(95% confidence interval) | LD <sub>50</sub> ( $\times 10^3$ conidia)<br>(95% confidence interval) |
|-----------|------------------------------------------------------|------------------------------------------------------------------------|
| Wild type | 6.59 (6.32 – 6.98)                                   | 5.83 (4.47 – 7.55)                                                     |
| BbVRF1    | 4.81 (4.56 – 5.03)                                   | 1.69 (1.22 – 2.24)                                                     |

LT<sub>50</sub>: median lethal time at  $1 \times 10^4$  conidia of injection treatment.

LD<sub>50</sub>: median lethal dose at 8 days after the injection treatments ( $1 \times 10^2$ ,  $1 \times 10^3$ ,  $5 \times 10^3$ ,  $1 \times 10^4$  and  $2.5 \times 10^4$  conidia).
